# Growth hormone replacement therapy reduces risk of cancer in adult with growth hormone deficiency: A meta-analysis

Zhanzhan Li<sup>1</sup>, Qin Zhou<sup>1</sup>, Yanyan Li<sup>2</sup>, Jun Fu<sup>1</sup>, Xinqiong Huang<sup>1</sup>, Liangfang Shen<sup>1</sup>

<sup>1</sup>Department of Oncology, Xiangya Hospital, Central South University, Changsha, Hunan Province 410008, China

<sup>2</sup>Xiangya Hospital, Central South University, Changsha, Hunan Province 410008, China

Correspondence to: Liangfang Shen, email: liangfangshen86@126.com

Keywords: growth hormone therapy, growth hormone deficiency, cancer, meta-analysis

Received: August 08, 2016

Accepted: October 28, 2016

Published: November 09, 2016

## ABSTRACT

The risk of growth hormone on cancer in adult with growth hormone deficiency remains unclear. We carried out a meta-analysis to evaluate the risk of cancer in adult with and without growth hormone replacement therapy. We searched PubMed, Web of Science, China National Knowledge Infrastructure, and WanFang databases up to 31 July 2016 for eligible studies. Pooled risk ratio (RR) with 95% confidence interval (CI) was calculated using fixed-or random-effects models if appropriate. The Newcastle-Ottawa Scale was used to assess the study quality. Two retrospective and seven prospective studies with a total of 11191 participants were included in the final analysis. The results from fixed-effects model showed this therapy was associated with the decreased risk of cancer in adult with growth hormone deficiency (RR=0.69, 95%CI: 0.59-0.82), with low heterogeneity within studies ( $I^2=39.0%$ ,  $P=0.108$ ). We performed sensitivity analyses by sequentially omitting one study each time, and the pooled RRs did not materially change, indicating that our results were statistically stable. Begger's and Egger's tests suggested that there was no publication bias ( $Z=-0.63$ ,  $P=0.520$ ;  $t=0.16$ ,  $P=0.874$ ). Our study suggests that growth hormone replacement therapy could reduce risk of cancer in adult with growth hormone deficiency.

## INTRODUCTION

Growth hormone secreted by the pituitary gland plays important roles in the process of promoting the growth and development for children and regulating the materials metabolism and achieving an energy balance for adult [1]. The adult growth hormone deficiency (AGHD) could cause a series of abnormal manifestations, such as increased body lipid profile, abdominal obesity, impaired glucose tolerance, increased mortality risk of cardiovascular diseases, and so forth [2, 3]. The growth hormone replacement therapy (GHRT) in AGHD patients has been carried out extensively in the last 20 years. Almost all of studies have suggested considerable therapeutic benefits with improvements in lowering the risk of cardiovascular, exercise performance and quality of life [4-6]. Growth hormone has now been approved for children and adult in many countries including Europe, USA and Asia. The safety of growth

hormone in the short stage clinical trials is no doubt, but there are still concerns in other clinical setting. The association between GHRT and risk of tumor in adult has remained an important topic.

The hypothesis about the risk of cancer in GHRT patients was based on the biological nature of growth hormone and insulin-like growth factor-1 (IGF-1) [7]. Both experiment and epidemiological have demonstrated that growth hormone and IGF-1 can affect cells in endocrine, paracrine an autocrine manner. It has been proved that the growth promoting function of growth hormone is mainly regulated by IGF-1 [8]. The related signaling transduction cascade induced by IGF-1 receptors can stimulate the cell proliferation and survival [9]. While there are strong evidences from animal and cell experiments suggesting that growth hormone and IGF-1 were involved in the occurrence and development of tumors, such an evidence in human study remains unclear. Several observational studies have suggested an association between IGF-1 level

in circulation and a risk of some cancer, such as breast cancer and colorectal neoplasms [10, 11]. Early studies also showed that GHRT was not associated with increased tumor risk. However, a report with 5-year follow-up found that children with GHRT have a higher risk of neoplasms compared with non GHRT. Some studies showed an increased cancer risk [12–14], but others not [15, 16]. The results whether GHRT increased the cancer risk in AGHD patients still remain unclear. The quality and consistency of epidemiological evidence on the topic have not been systematically investigated, which is an important gap in our understanding of the effect of growth hormone on cancer occurrence. Thus, we carry out a meta-analysis to assess the risk of cancer in GHD patients with and without GHRT.

## RESULTS

### Study selection

The initial search returned 1808 records, of which 345 duplicates were excluded. After screening the titles and abstracts, 1431 records were excluded for various reasons (case reports, review, not human study, gene study, unexpected outcomes). Finally, 2 retrospective studies and 7 prospective studies were included in the final analysis (see more details in Figure 1) [12–14, 16–21].

### Study characteristics

The main characteristics of included studies are presented in Table 1. Specifically, the studies were

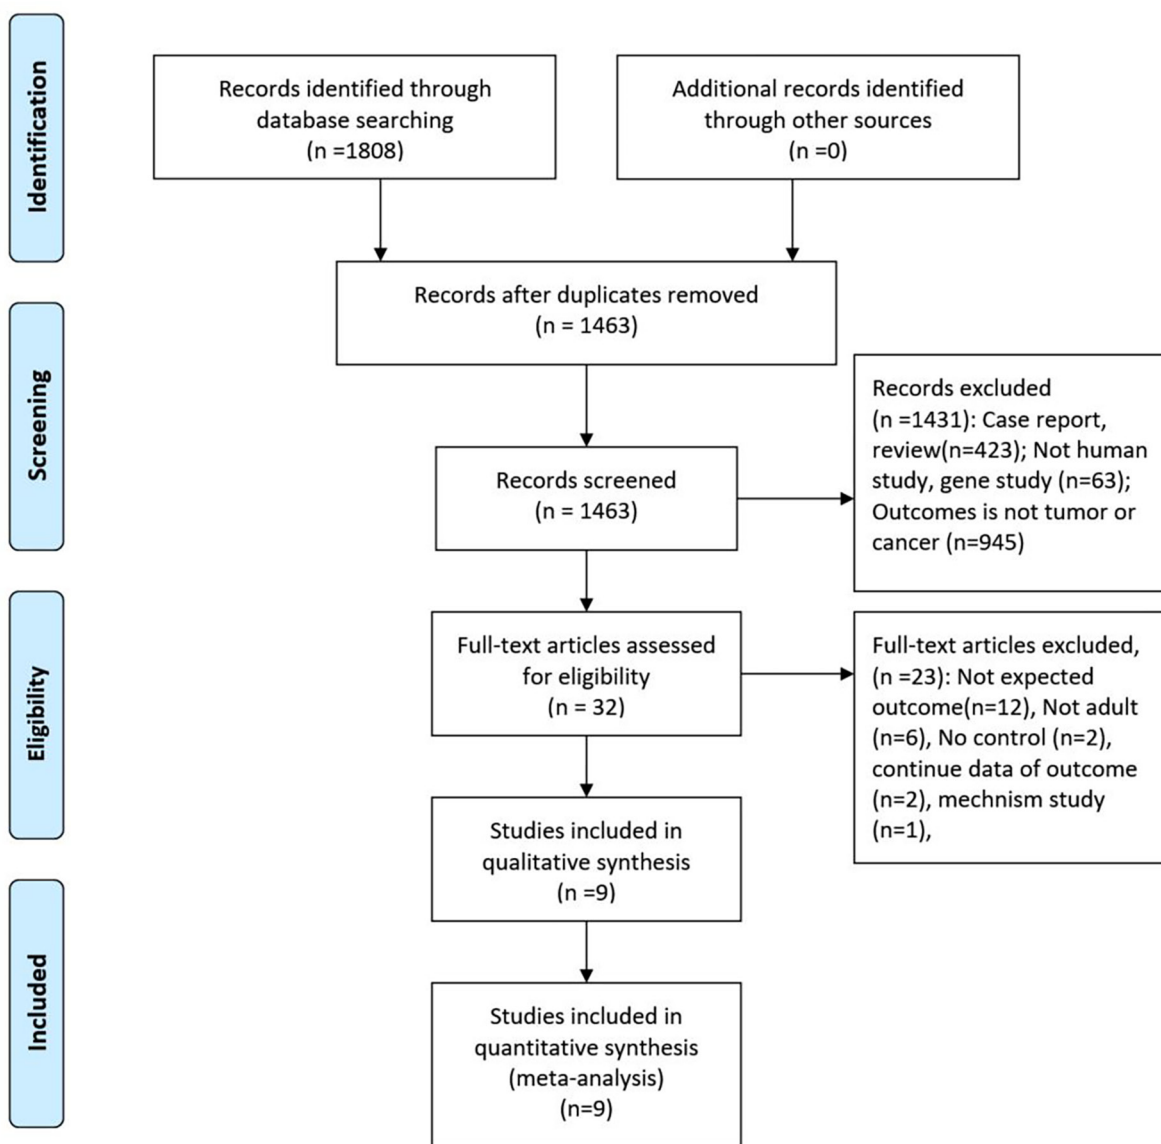

Figure 1: The process of study selection.

**Table 1: General characteristics of studies included in the meta-analysis**

| Author Year      | Country | Study design        | Age (T/C*) | Male  | Dose of GH(UI)     | Follow-up(y) | Outcomes           | Sample size (T/C) | Outcomes (T/C) |
|------------------|---------|---------------------|------------|-------|--------------------|--------------|--------------------|-------------------|----------------|
| Buchfelder 2007  | Germany | Retrospective study | 42.1/55.5  | -     | 1.3 UI             | 5.0          | Pituitary adenomas | 55/55             | 18/14          |
| Olsson 2009      | Sweden  | Prospective study   | 66.7/66.7  | 66%   | F:0.36<br>M:0.45mg | 10.0         | Pituitary adenomas | 121/114           | 31/37          |
| Hatrack 2002     | UK      | Prospective study   | 49/52      | 53.3% | -                  | 3.6          | Pituitary tumor    | 47/28             | 2/2            |
| Olsson 2012      | Sweden  | Prospective study   | 46.6/45.7  | 53.3% | F:0.72<br>M:0.45   | 13.6         | Craniopharyngioma  | 56/70             | 9/30           |
| Child 2011       | USA     | Prospective study   | 46.4/54.4  | 55.0% | -                  | 3.7          | Primary cancers    | 6840/940          | 350/71         |
| Arnold 2009      | UK      | Prospective study   | 53.7/56.2  | 59.2% | 0.1-0.8mg          | 6.8          | Pituitary adenomas | 23/107            | 8/38           |
| Karativetak 2006 | UK      | Prospective study   | 17.6/38.8  | 61.2% | 0.3-2UI            | 10.8         | craniopharyngioma  | 32/53             | 4/22           |
| Mackenzie 2011   | UK      | Retrospective study | 33/29      | 51.4% | -                  | 14.5         | Pituitary tumor    | 110/110           | 11/11          |
| Hartman 2013     | USA     | Prospective study   | 46.0/55.0  | 59.0% | 6-12 ug/<br>kg/d   | 2.3          | Pituitary tumor    | 1988/442          | 32/12          |

\* T=treatment, C=Control

published from 2002 to 2013. In total, 11191 participants, 9272 from treatment group, and 1919 from control group were enrolled. The follow-up duration ranged from 2.3 to 14.5 years. Outcomes of 2 studies were craniopharyngioma, and the rest were pituitary adenomas or tumor (see more details in Table 1).

### Assessment of quality

The mean score of included studies is 7.1 (6-8), which could be considered to be priority according to the assessment criteria. The overview of the quality of included studies are comparable. The primary flaw of all studies is the lack of data after expected outcomes occur. One study did not give details about baseline characteristic. The Supplementary Table S1 shows these details.

### Pooled results

Figure 2 presented the combined the results from the fixed-effects model. In totally, 11191 study subjects were included in the analysis. The results suggested that GH replacement therapy was associated with the decreased risk of cancer in adult with GHD (RR=0.69, 95%CI: 0.59-0.82), with low heterogeneity across studies ( $I^2=39.0\%$ ,  $P=0.108$ ).

To examine the stability of pooled results, we also conducted subgroup analyses by excluding some studies. The following four types were conducted: Type I:

excluding 2 retrospective studies (RR=0.65, 95%CI:0.54-0.77, Figure 3); Type II: excluding 2 studies with less than 100 sample (RR=0.72, 95%CI:0.61-0.85). Type III: excluding 2 studies with craniopharyngioma (RR=0.76, 95%CI:0.64-0.91). Type IV: excluding 3 studies with less than 3-year follow-up (RR=0.73, 95%CI:0.57-0.93). All four types showed growth hormone replacement therapy was associated with a decreased risk of cancer.

### Sensitivity analysis

We performed a sensitivity analysis by sequentially omitting one study each time, and the pooled RRs did not materially change, indicating that our results were statistically stable (Figure 4).

### Publication bias

As shown in Figure 5, the funnel plot is relatively symmetrical. Begger's and Egger's tests suggested that there was no publication bias ( $Z=-0.63$ ,  $P=0.520$ ;  $t=0.16$ ,  $P=0.874$ ).

## DISCUSSION

Our results suggest that growth hormone replacement therapy reduces risk of cancer in adult. In addition, the association was also consistent in sensitivity analyses.

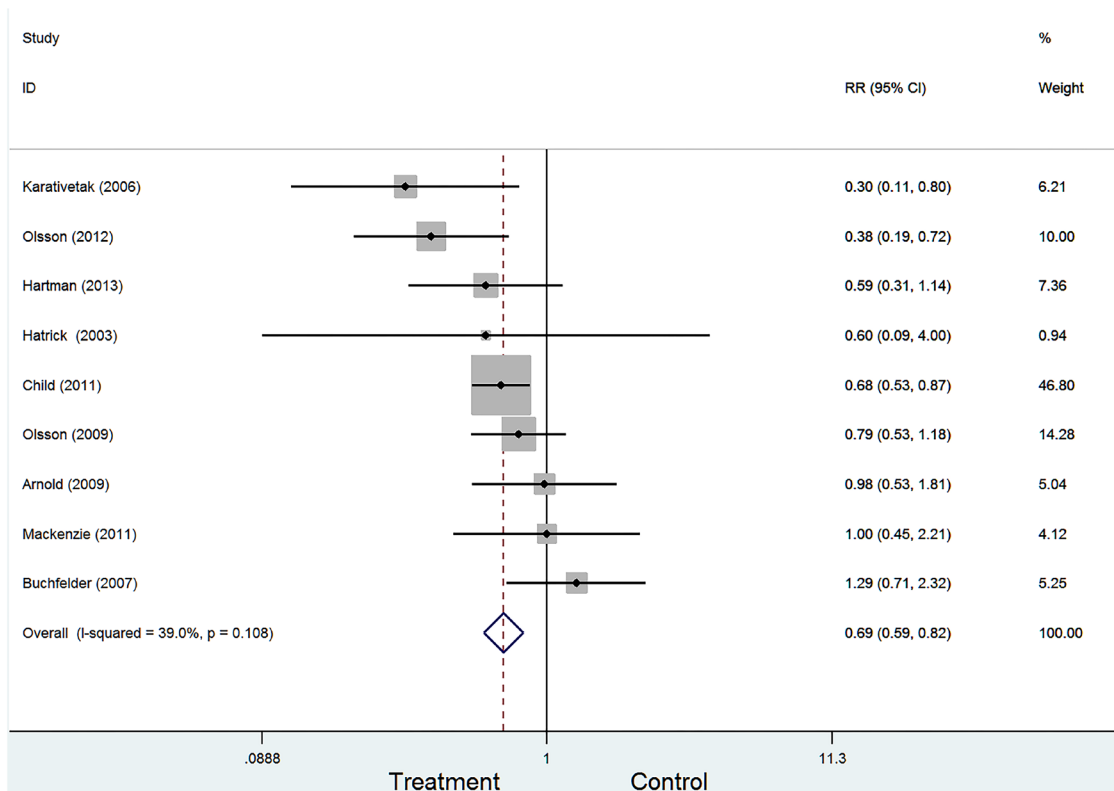

Figure 2: Forest plot for GH replacement therapy for cancer risk in adult with GHD.

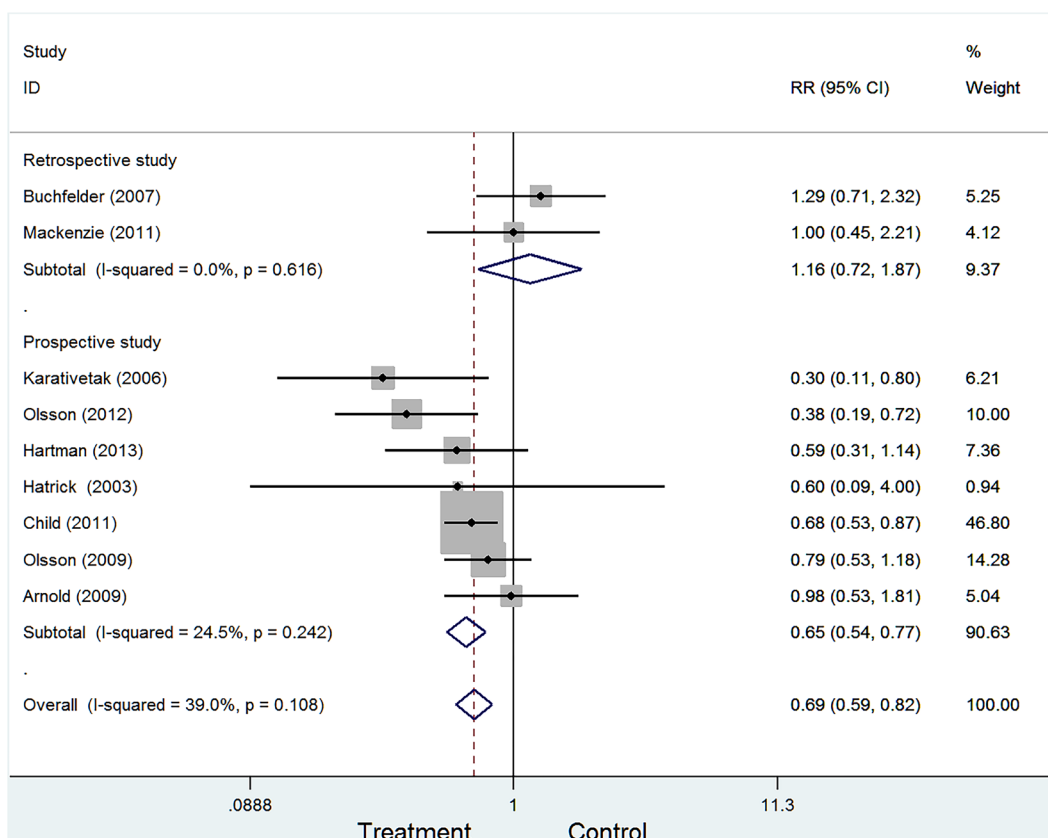

Figure 3: Forest plot of subgroup according to study designed type.

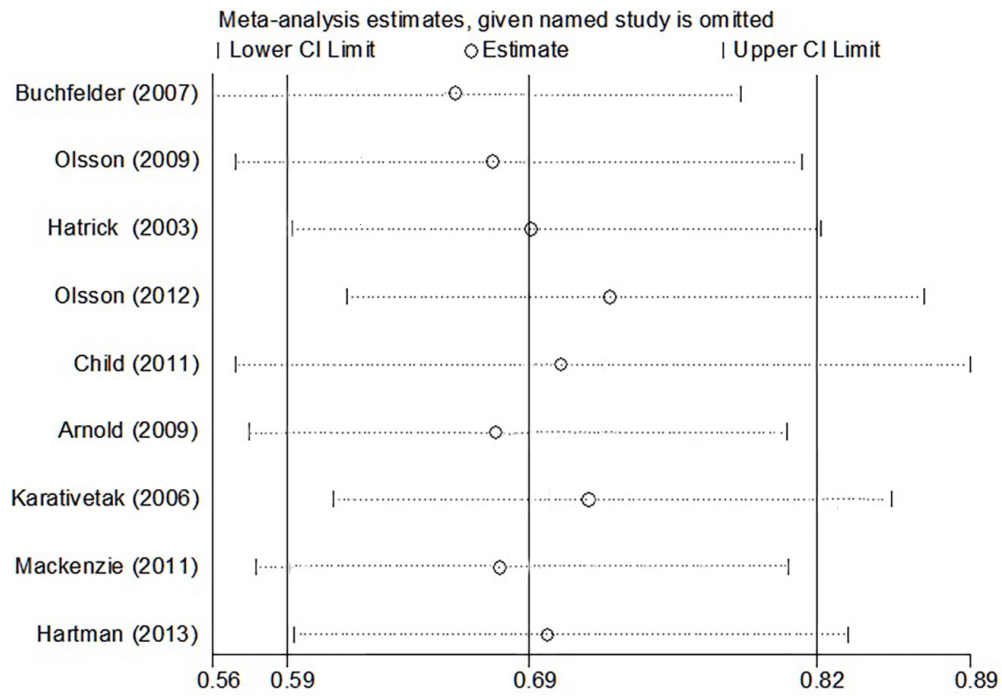

Figure 4: Sensitivity analysis from fixed-effects estimates.

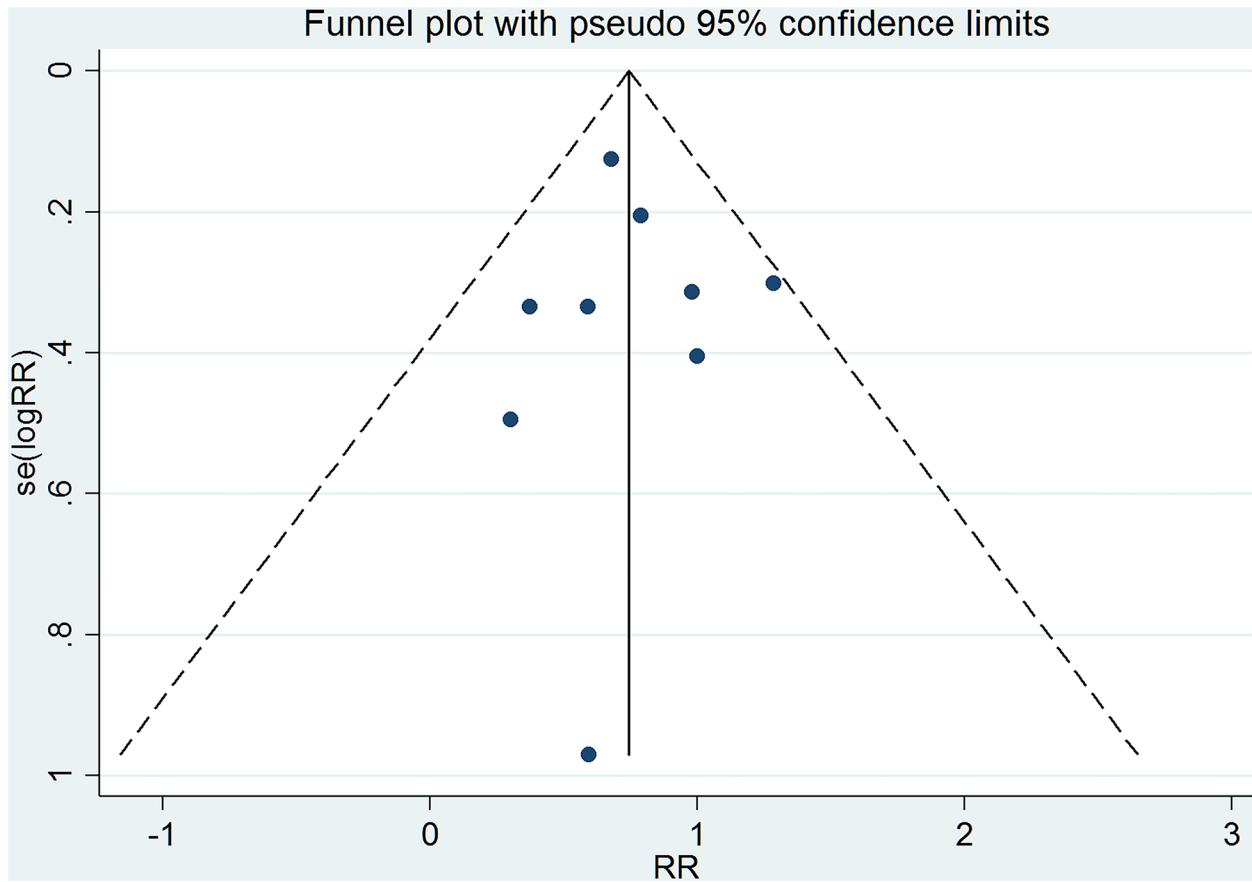

Figure 5: Funnel plot for GH replacement therapy reduces risk of cancer in adult with GHD.

The association between GH-IGF-1 and tumor shows a huge difference among *in vitro*, animal experiments and epidemiological investigation. *In vitro*, growth hormone can stimulate lymphocytes to lymphoblast, growth hormone and its receptors were expressed in almost cancer cells. Over-expression of growth hormone could promote cell proliferation and apoptosis reduction for breast cancer. The IGF-1 also has proliferation and anti-apoptosis property for all types of cell. IGF-1 induces human leukemia cell proliferation and increased DNA replication of liver cell tumor in rat. This function can be inhibited using related antagonist inhibits [22]. Besides, IGF-1 in circulation can be combined with all kinds of binding protein, such as insulin-like growth factor binding protein 3 [23]. With different from IGF-1, insulin-like growth factor binding protein 3 can limit the bioactivity of IGF-1, and exerts its action of inhibiting tumor cell growth [24]. In animal experiments, selective knockout of IGF-1 gene causes reduction of IGF-1 level in circulation, and occurrence rate of breast cancer significantly decreased. Also, IGF-1 has a potential of promoting neoplasm metastasis [25]. Many epidemiology studies also mentioned IGF-1 level in plasma is associated with an increased risk of cancer [9, 10]. However, epidemiology studies did not found such an association in human investigation. All of studies included in the meta-analysis reported that growth hormone therapy is not associated with an increased risk of tumor occurrence or recurrence. Child et al found that the overall primary cancer risk in 6840 patients receiving growth hormones adults did not increase, but elevated standardized incidence were found for subgroups in the USA cohort defined by age <35 years [13]. Hartman conducted a prospective study with 1988 growth hormone-treated and 442 untreated GHD patients, and there was no evidence for a growth hormone therapy effect on cancer [17]. Buchfelder also found growth hormone substitution should not be withheld in deficient patients. But a period of 5 years may not have been long enough to verify this influence on recurrence potential [21]. In parallel with these above study, the latter study found unrelated results [12]. On the contrary, our results even found that growth hormone therapy is associated with a decreased risk of the whole group. This finding is the same as the Olsson and his colleagues' report that long-term (10 years) use of growth hormone in hypopituitarism may be considered to be safe in patients with residual pituitary adenomas [19]. Although we do not exactly how this results happen, the present findings hinted that growth hormone therapy are acceptable and safety under the evidence.

Our meta-analysis has some strengths. This study was in accordance with the guidelines of Meta-analysis of Observational Studies in Epidemiology guideline. Also, all included studies in the meta-analysis were cohort studies with a mean score of 7.1, which was quite high-quality. Besides, heterogeneity within studies is quite low, and the combined results could minimize the likelihood of some bias. Both Begger's and Egger's test suggested

that there was no publication bias, which further showed the stability of results. Several limitations of this meta-analysis merit consideration. First, the sample size of two studies included studies is less than 100, and may have a low statistical power. Second, the outcome is pituitary tumor and craniopharyngioma, and the present results may be inappropriate for other population setting. Third, two studies treated tumor recurrence as the outcome. Considering the difference between population with secondary and primary tumor, this factor may have some influence on the pooled results. Patients with secondary tumor usually have weak physical condition, and tend to have tumor. After reviewing these studies, both treatment and control group of two studies are those diagnosed with tumor. This balance between two group could reduce some bias. Furthermore, our results were based on unadjusted data, these results could be affected by confounders, and we could not assess the impact of GHRT on other clinical outcome events. Further large-scale controlled surveys are needful.

In conclusion, our results suggest that growth hormone replacement therapy reduces risk of cancer in adult with growth hormone deficiency. Future study with more long-term follow-up are needed to explore the association between GHRT and recurrence of cancer or other types of tumor.

## **MATERIALS AND METHODS**

### **Literature search**

We conducted the meta-analysis and systematic review in accordance with the guidelines of Meta-analysis of Observational Studies in Epidemiology guideline (MOOSE, Supplementary Table S2) [26]. We searched PubMed, Web of Science, China National Knowledge Infrastructure (CNKI), and WanFang databased from inception to 31 July 2016 for eligible studies, using the following MeSH Terms: 'Hypopituitarism' OR 'Growth hormone' OR 'Growth hormone deficiency' OR 'Growth hormone drug effect' OR 'Growth hormone therapeutic' OR 'GHD' OR 'GH deficiency' and 'Cancer' OR 'Tumor' OR 'neoplasm'. We also searched the reference lists of previous related reviews for further studies.

### **Selection criteria**

Two authors (LZZ and LYY) independently carried out the initial search, deleted republication, screened the titles and abstracts for relevance, and identified studies. Any discrepancy was resolved by discussion and consensus.

The included study need meet the following criteria: (1) Study design: we included a retrospective or prospective study (random or semi-random or cohort study) published in English and Chinese; (2) Study

population: Adults with GHD according to diagnostic criteria; (3) Intervention: treatment group receives growth hormone replacement therapy, and control had not received growth hormone replacement therapy; (4) Outcome: tumor, cancer or neoplasm during follow-up. When multiple publications were published from the same study, we used the one with the largest sample size.

### Data extraction

We extracted the following data from each study: first author, publication year, country, type of study design, age of study population, male ratio, duration of follow-up, outcomes, sample size, and number of occurrence outcomes. One author (LZZ) extracted data, and another author (LYY) checked them for accuracy.

### Assessment of quality

Two investigators independently used the Newcastle-Ottawa Scale (NOS) to assess the quality of each study [27]. Study with 7-8 adequate items is considered to be priority, equal or more than 5 items is high quality, and study with less than 5 items is considered to be low quality.

### Statistical analysis

The risk ratio (RR) was used as a common measure of the association between GHRT and cancer risk across studies. Heterogeneity was evaluated by using Cochran Q statistic and quantified with  $I^2$  statistic, which was used to describe the variation of effect size that is attributed to heterogeneity within studies [28, 29]. We considered  $I^2$  value more than 50% to be significant heterogeneity. Fixed effects models would be selected for  $I^2 < 50\%$  and random-effects would be chosen for  $I^2 \geq 50\%$ . We conducted subgroup analyses for exploring the source of heterogeneity, and examining the stability of pooled results. The subgroup analyses were carried out according to four types: Type I: study design (retrospective vs prospective); Type II: sample size ( $\leq 100$  vs.  $> 100$ ); Type III: cancer type (craniopharyngioma vs not); Type IV: duration of follow-up. We used Begg's funnel plots and Egger's regression test to detect publication bias [30, 31]. All statistical analyses were performed by using Stata 14.0 (Corp, College Station TX, USA),  $P < 0.05$  was considered to be statistically significant.

### Abbreviations

Growth hormone, GH; Adult growth hormone deficiency, AGHD; Growth hormone replacement therapy, GHRT; IGF-1, insulin-like growth factor-1; Risk ration, RR; Confidence interval, CI.

## ACKNOWLEDGMENTS

LZZ and SLF designed this study and contributed substantially to the design of the search strategy. LZZ and LYY searched and selected the trials and extracted data. LZZ, LYY, ZQ, and HXQ performed the analysis and interpreted the data. LZZ wrote the manuscript. LZZ and LYY critically reviewed the manuscript. LZZ, LYY, FJ and HXQ participated in the data extraction and critically revised it. LZZ and SLF proofread the final version. All authors read and approved the final manuscript.

## CONFLICTS OF INTEREST

The authors declare that they have no conflict of interest.

## REFERENCES

1. Audi L, Fernandez-Cancio M, Camats N, Carrascosa A. Growth hormone deficiency: an update. *Minerva Endocrinol.* 2013; 38:1-16.
2. Monson JP. Adult growth hormone deficiency. *J R Coll Physicians Lond.* 1998; 32:19-22.
3. Lanes R. Cardiovascular Risk in Growth Hormone Deficiency: Beneficial Effects of Growth Hormone Replacement Therapy. *Endocrinol Metab Clin North Am.* 2016; 45:405-418.
4. van Bunderen CC, van Varsseveld NC, Heymans MW, Franken AA, Koppeschaar HP, van der Lely AJ, Drent ML. Effect of long-term GH replacement therapy on cardiovascular outcomes in GH-deficient patients previously treated for acromegaly: a sub-analysis from the Dutch National Registry of Growth Hormone Treatment in Adults. *Eur J Endocrinol.* 2014; 171:717-726.
5. Krantz E, Trimpou P, Landin-Wilhelmsen K. Effect of Growth Hormone Treatment on Fractures and Quality of Life in Postmenopausal Osteoporosis: A 10-Year Follow-Up Study. *J Clin Endocrinol Metab.* 2015; 100:3251-3259.
6. Mo D, Blum WF, Rosilio M, Webb SM, Qi R, Strasburger CJ. Ten-year change in quality of life in adults on growth hormone replacement for growth hormone deficiency: an analysis of the hypopituitary control and complications study. *J Clin Endocrinol Metab* 2014; 99:4581-4588.
7. Le Roith D, Bondy C, Yakar S, Liu JL, Butler A. The somatomedin hypothesis: 2001. *Endocr Rev.* 2001; 22:53-74.
8. Clayton PE, Banerjee I, Murray PG, Renehan AG. Growth hormone, the insulin-like growth factor axis, insulin and cancer risk. *Nat Rev Endocrinol.* 2011; 7:11-24.
9. Chan JM, Stampfer MJ, Giovannucci E, Gann PH, Ma J, Wilkinson P, Hennekens, C H, Pollak, M. Plasma insulin-like growth Factor-I and prostate cancer risk: a prospective study. *Science.* 1998; 279:563-566.

10. Mucci LA, Stark JR, Pollak MN, Li H, Kurth T, Stampfer MJ, Ma J. Plasma levels of acid-labile subunit, free insulin-like growth factor-I, and prostate cancer risk: a prospective study. *Cancer Epidemiol Biomarkers Prev*. 2010; 19:484-491.
11. Paterson AC, Leeding KS, Bach LA, Baldwin GS, Macrae FA, Shulkes A. More about: prospective study of colorectal cancer risk in men and plasma levels of insulin-like growth factor (IGF)-I and IGF-binding protein-3. *J Natl Cancer Inst*. 2000; 92:1947-1950.
12. Olsson DS, Buchfelder M, Wiendieck K, Kremenevskaja N, Bengtsson BA, Jakobsson KE, Jarfelt, M, Johannsson, G, Nilsson, AG. Tumour recurrence and enlargement in patients with craniopharyngioma with and without GH replacement therapy during more than 10 years of follow-up. *Eur J Endocrinol*. 2012; 166:1061-1068.
13. Child CJ, Zimmermann AG, Woodmansee WW, Green DM, Li JJ, Jung H, Erfurth, EM, Robison, LL. Assessment of primary cancers in GH-treated adult hypopituitary patients: an analysis from the Hypopituitary Control and Complications Study. *Eur J Endocrinol*. 2011; 165:217-223.
14. Karavitaki N, Warner JT, Marland A, Shine B, Ryan F, Arnold J, Turner, HE, Wass, JA. GH replacement does not increase the risk of recurrence in patients with craniopharyngioma. *Clin Endocrinol (Oxf)*. 2006; 64:556-560.
15. Arnold JR, Arnold DF, Marland A, Karavitaki N, Wass JA. GH replacement in patients with non-functioning pituitary adenoma (NFA) treated solely by surgery is not associated with increased risk of tumour recurrence. *Clin Endocrinol (Oxf)*. 2009; 70:435-438.
16. Hatrick AG, Boghalo P, Bingham JB, Ayres AB, Sonksen PH, Russell-Jones DL. Does GH replacement therapy in adult GH-deficient patients result in recurrence or increase in size of pituitary tumours? *Eur J Endocrinol*. 2002; 146:807-811.
17. Hartman ML, Xu R, Crowe BJ, Robison LL, Erfurth EM, Kleinberg DL, Zimmermann, A G Woodmansee, W W, Cutler, GB Jr, Chipman, J J, Melmed, S. Prospective safety surveillance of GH-deficient adults: comparison of GH-treated vs untreated patients. *J Clin Endocrinol Metab*. 2013; 98:980-988.
18. Mackenzie S, Craven T, Gattamaneni HR, Swindell R, Shalet SM, Brabant G. Long-term safety of growth hormone replacement after CNS irradiation. *J Clin Endocrinol Metab*. 2011; 96:2756-2761.
19. Olsson DS, Buchfelder M, Schlaffer S, Bengtsson BA, Jakobsson KE, Johannsson G, Nilsson AG. Comparing progression of non-functioning pituitary adenomas in hypopituitarism patients with and without long-term GH replacement therapy. *Eur J Endocrinol*. 2009; 161:663-669.
20. Arnold JR, Arnold DF, Marland A, Karavitaki N, Wass JA. GH replacement in patients with non-functioning pituitary adenoma (NFA) treated solely by surgery is not associated with increased risk of tumour recurrence. *Clin Endocrinol (Oxf)*. 2009; 70:435-438.
21. Buchfelder M, Kann PH, Wuster C, Tuschy U, Saller B, Brabant G, Kleindienst, A, Nomikos, P. Influence of GH substitution therapy in deficient adults on the recurrence rate of hormonally inactive pituitary adenomas: a case control study. *Eur J Endocrinol*. 2007; 157:149-156.
22. Jenkins PJ, Mukherjee A, Shalet SM. Does growth hormone cause cancer? *Clin Endocrinol (Oxf)*. 2006; 64:115-121.
23. Pollak MN. Insulin-like growth factors and neoplasia. *Novartis Found Symp*. 2004; 262:84-98, 98-107, 265-268.
24. Renehan AG, Zwahlen M, Minder C, O'Dwyer ST, Shalet SM, Egger M. Insulin-like growth factor (IGF)-I, IGF binding protein-3, and cancer risk: systematic review and meta-regression analysis. *Lancet*. 2004; 363:1346-1353.
25. Sachdev D, Hartell JS, Lee AV, Zhang X, Yee D. A dominant negative type I insulin-like growth factor receptor inhibits metastasis of human cancer cells. *J Biol Chem*. 2004; 279:5017-5024.
26. Stroup DF, Berlin JA, Morton SC, Olkin I, Williamson GD, Rennie D, et al.. Meta-analysis of observational studies in epidemiology: a proposal for reporting. Meta-analysis Of Observational Studies in Epidemiology (MOOSE) group. *JAMA*. 2000; 283:2008-2012.
27. Wells GA, Shea B, Connell DO, Peterson J, Welch V, Losos M, Tugwell P. The Newcastle-Ottawa Scale (NOS) for assessing the quality if nonrandomized studies in meta-analyses. [http://www.ohri.ca/programs/clinical\\_epidemiology/oxford.asp](http://www.ohri.ca/programs/clinical_epidemiology/oxford.asp). Accessed in August 6, 2016.
28. DerSimonian R, Laird N. Meta-analysis in clinical trials. *Control Clin Trials*. 1986; 7:177-188.
29. Higgins JP, Thompson SG, Deeks JJ, Altman DG. Measuring inconsistency in meta-analyses. *BMJ*. 2003; 327:557-560.
30. Begg CB, Mazumdar M. Operating characteristics of a rank correlation test for publication bias. *Biometrics*. 1994; 50:1088-1101.
31. Egger M, Davey SG, Schneider M, Minder C. Bias in meta-analysis detected by a simple, graphical test. *BMJ*. 1997; 315:629-634.
